# Supplementary material for: Intraocular Adeno-Associated Virus-Mediated Transgene Endothelin-1 Delivery to the Rat Eye Induces Functional Changes Indicative of Retinal Ischemia—A Potential Chronic Glaucoma Model
Source: MDPI journal article supplement (doi:10.3390/cells12151987), 2023-08-02
Supplement: s1 [file s1]

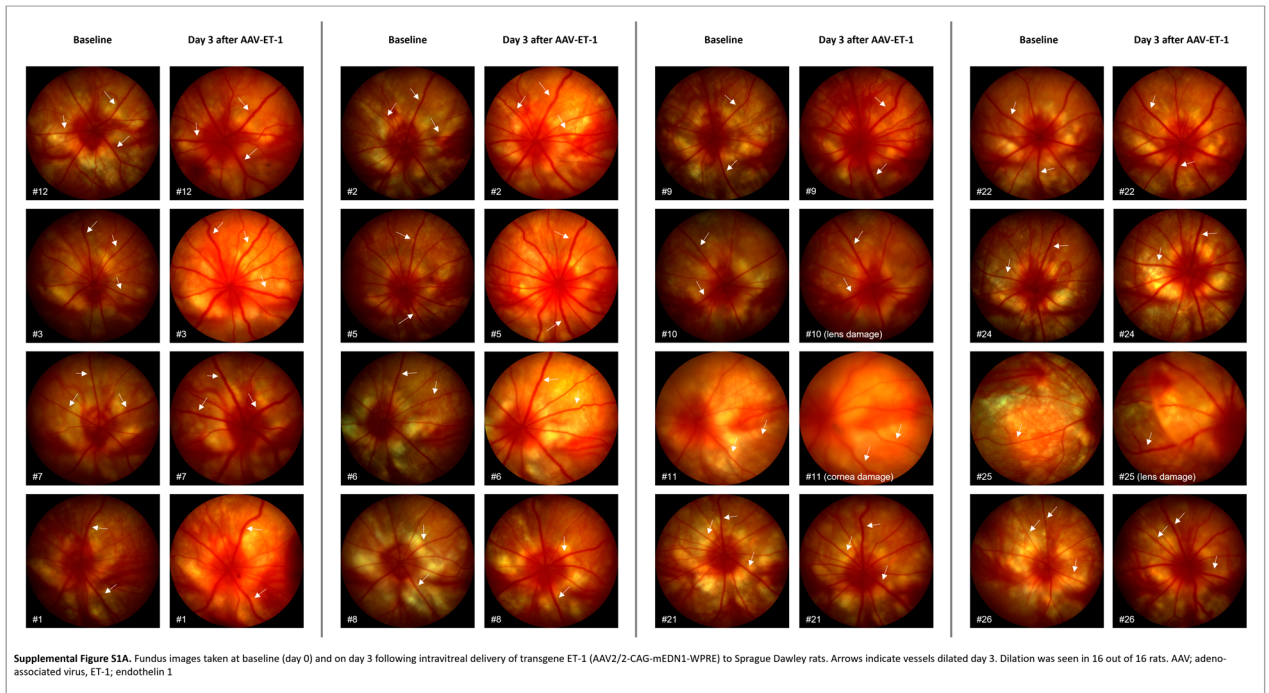

**Figure S1A.** Fundus images taken prior to and on day 3 after intravitreal delivery of transgene ET-1.

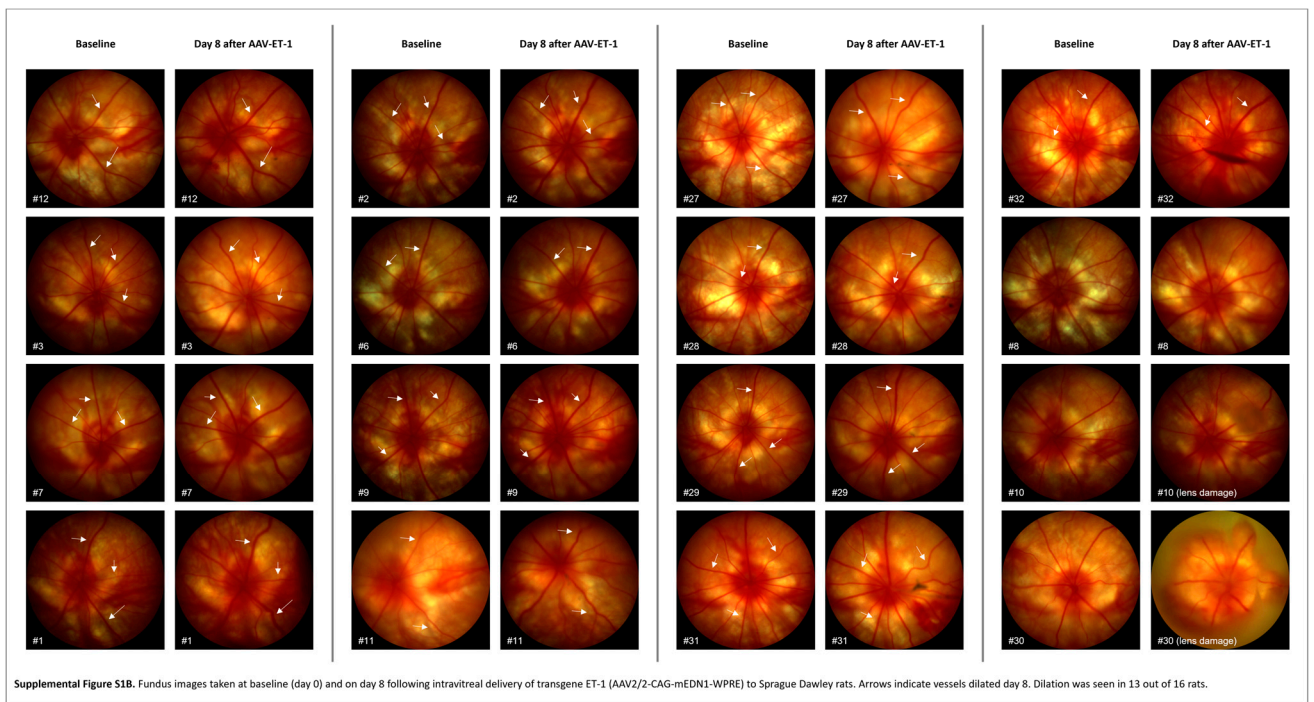

**Figure S1B.** Fundus images taken prior to and on day 8 after intravitreal delivery of transgene ET-1.

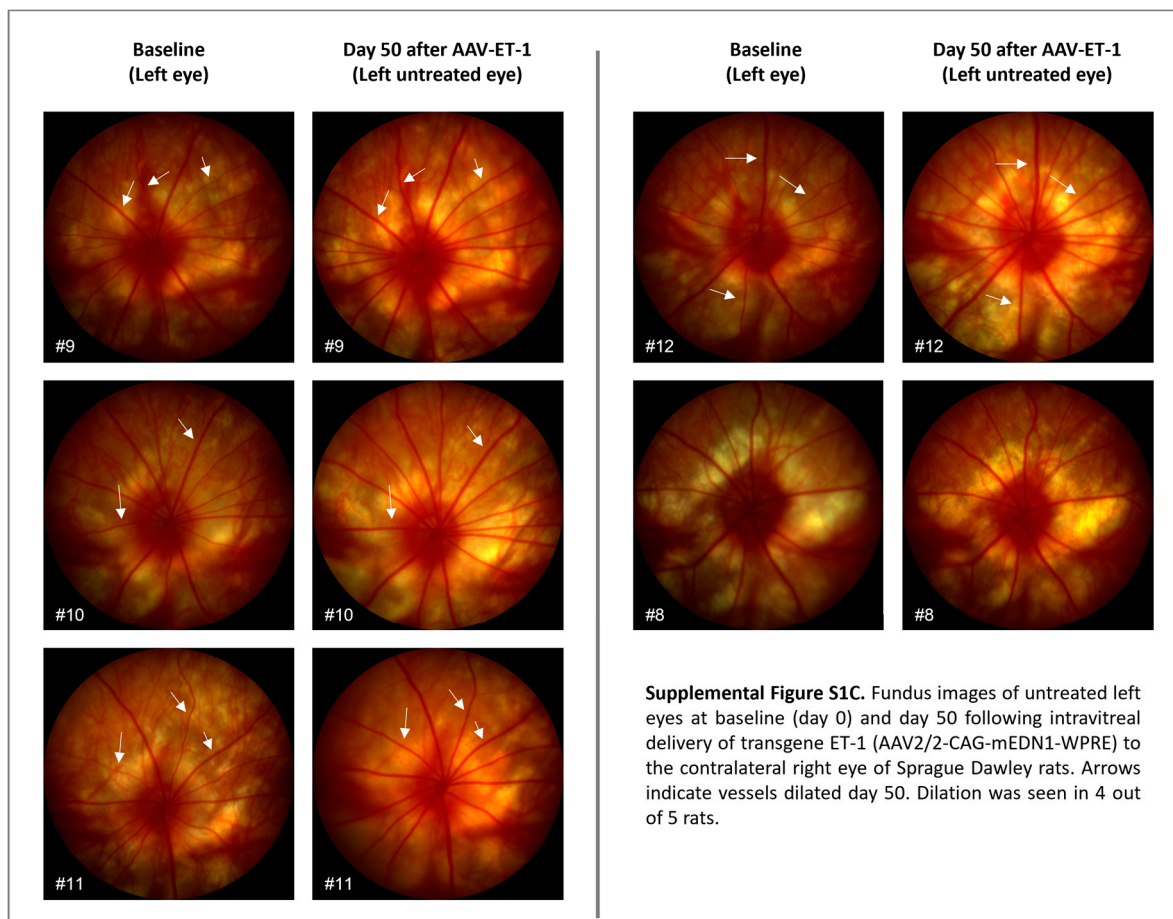

**Figure S1C.** Fundus images taken prior to and on day 50 after intravitreal delivery of transgene ET-1 to the contralateral eye.

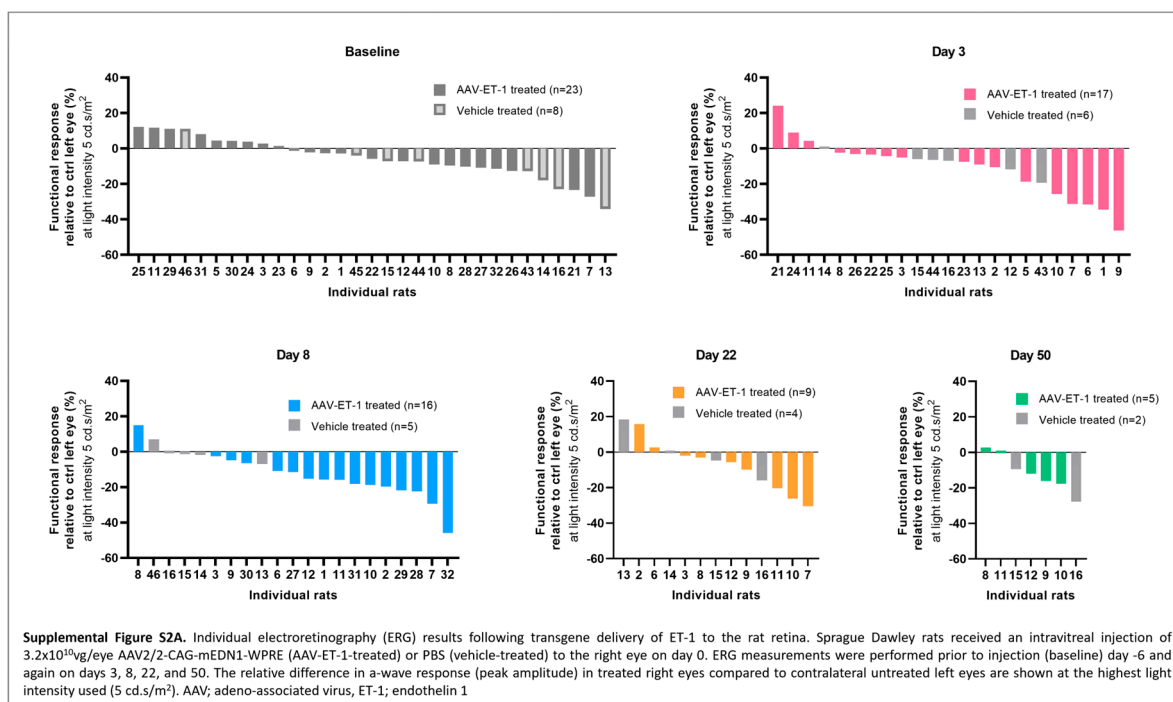

**Figure S2A.** Individual ERG results for a-wave peak amplitudes in transgene and vehicle-treated eyes relative to their contralateral untreated eyes.

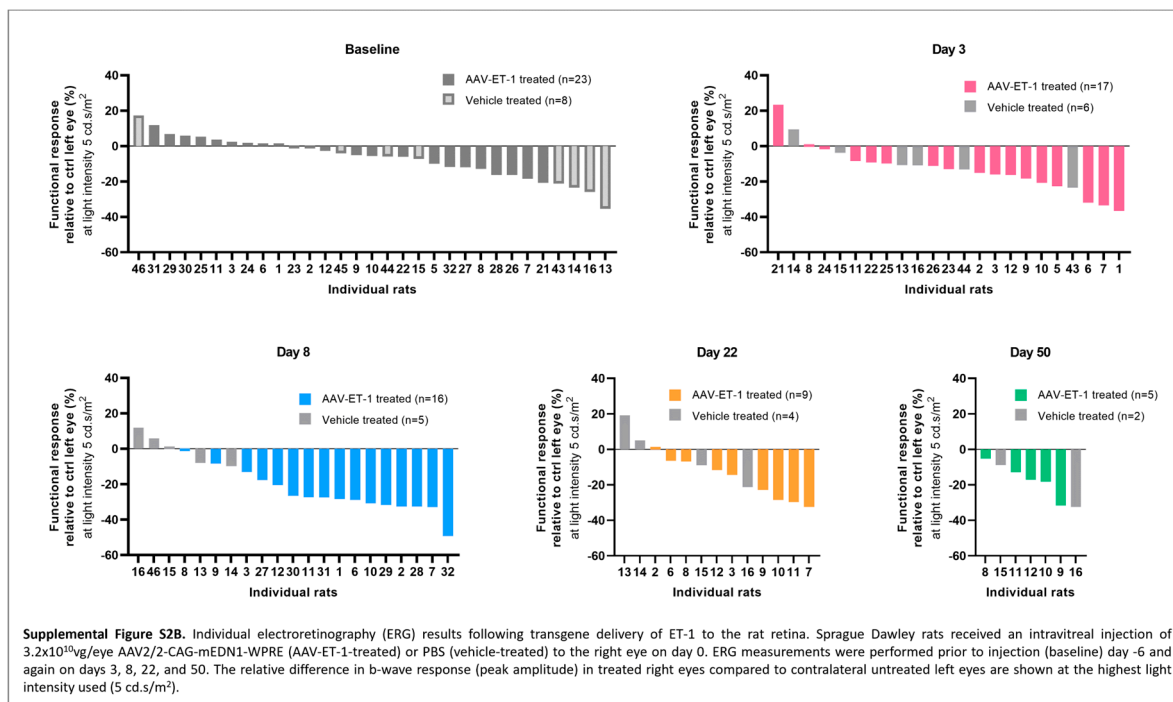

**Figure S2B.** Individual ERG results for b-wave peak amplitudes in transgene and vehicle-treated eyes relative to their contralateral untreated eyes.

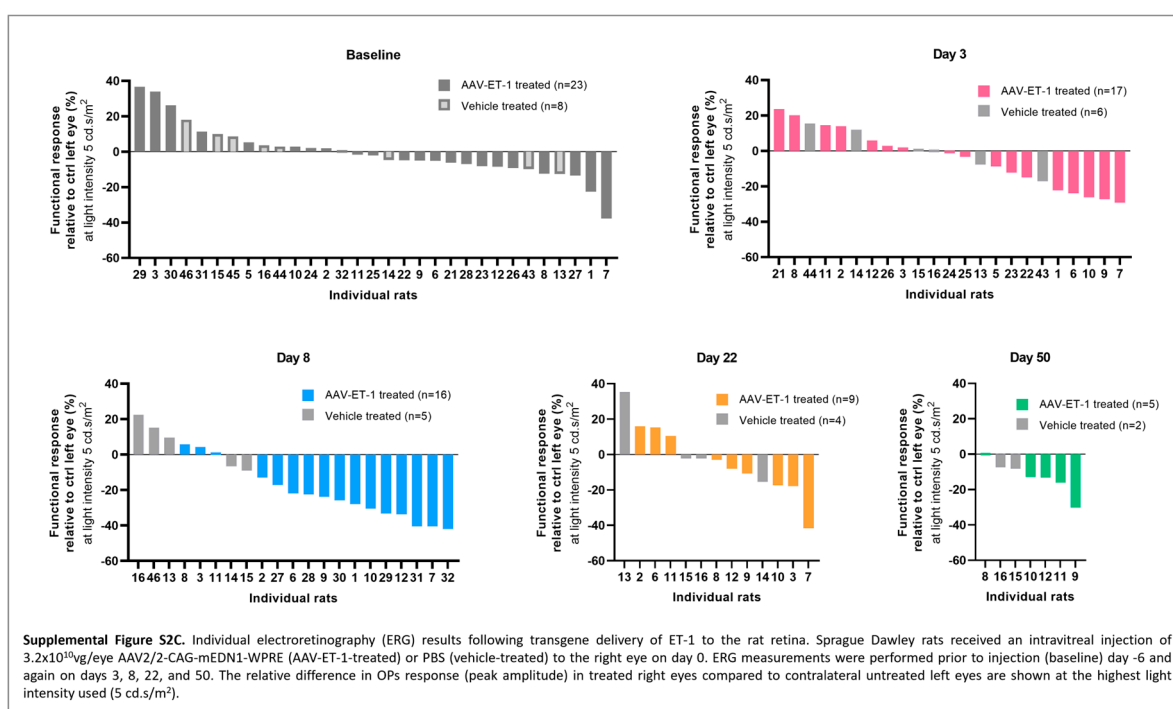

**Figure S2C.** Individual ERG results for OPs peak amplitudes in transgene and vehicle-treated eyes relative to their contralateral untreated eyes.
