# Supplementary material for: Intraocular Adeno-Associated Virus-Mediated Transgene Endothelin-1 Delivery to the Rat Eye Induces Functional Changes Indicative of Retinal Ischemia—A Potential Chronic Glaucoma Model
Source: MDPI journal article supplement (doi:10.3390/cells12151987), 2023-08-02
Supplement: s1 [file s1]

**Supplemental Table S1.** RT-qPCR results for transgene ET-1 gene expression.

Sprague Dawley rats recieved  $3.2 \times 10^{10}$  vg/eye AAV2/2-CAG-mEDN1-WPRE (AAV-ET-1, n=22) or vehicle (n=8) on day 0, delivered intravitreally to the right eye. Contralateral eyes were left untreated. Transgene mouse ET-1 gene (mEDN1) expression was measured using RT-qPCR on retinal tissue from right (DEX) treated and left (SIN) untreated eyes collected on different days after the injection.

| Sample#  |          | mean CT                   |       | mean CT                     |       | ΔCT                                  |       | ΔΔCT  |        | Fold change |        |      |
|----------|----------|---------------------------|-------|-----------------------------|-------|--------------------------------------|-------|-------|--------|-------------|--------|------|
|          |          | Transgene<br>(mouse ET-1) |       | Reference gene<br>(B-actin) |       | Normalized Transgene<br>(mouse ET-1) |       |       |        |             |        |      |
|          |          | DEX                       | SIN   | DEX                         | SIN   | DEX                                  | SIN   | DEX   | SIN    | DEX         | SIN    |      |
| AAV-ET-1 | Day 3    | 1                         | 22.79 | 34.05                       | 16.56 | 17.55                                | 6.22  | 16.50 |        |             |        |      |
|          |          | 2                         | 23.42 | 33.85                       | 15.82 | 16.87                                | 7.60  | 16.99 |        |             |        |      |
|          |          | 3                         | 24.24 | 31.01                       | 16.95 | 17.48                                | 7.29  | 13.53 |        |             |        |      |
|          |          | 4                         | 22.69 | 32.03                       | 16.69 | 17.23                                | 6.00  | 14.80 |        |             |        |      |
|          |          | 5                         | 22.76 | 33.18                       | 15.74 | 16.90                                | 7.01  | 16.28 |        |             |        |      |
|          |          | 6                         | 21.55 | 34.38                       | 16.12 | 17.73                                | 5.44  | 16.65 |        |             |        |      |
|          | Average: |                           | 22.91 | 33.08                       | 16.31 | 17.29                                | 6.59  | 15.79 | -9.20  | 0.00        | 586.72 | 1.00 |
|          | Day 8    | 7                         | 20.92 | 34.88                       | 16.84 | 17.59                                | 4.08  | 17.29 |        |             |        |      |
|          |          | 8                         | 21.07 | 34.21                       | 16.98 | 17.60                                | 4.09  | 16.61 |        |             |        |      |
|          |          | 9                         | 21.27 | 35.08                       | 17.42 | 17.67                                | 3.85  | 17.41 |        |             |        |      |
|          |          | 10                        | 21.74 | 34.73                       | 17.03 | 17.56                                | 4.71  | 17.17 |        |             |        |      |
|          |          | 11                        | 24.31 | 33.66                       | 16.98 | 16.98                                | 7.33  | 16.68 |        |             |        |      |
|          |          | 12                        | 22.55 | 34.68                       | 16.73 | 17.51                                | 5.82  | 17.17 |        |             |        |      |
|          | Average: |                           | 21.98 | 34.54                       | 17.00 | 17.49                                | 4.98  | 17.05 | -12.07 | 0.00        | 4,309  | 1.00 |
|          | Day 22   | 13                        | 17.15 | 33.65                       | 17.54 | 17.56                                | -0.39 | 16.08 |        |             |        |      |
|          |          | 14                        | 17.44 | 34.26                       | 17.67 | 17.57                                | -0.23 | 16.70 |        |             |        |      |
|          |          | 15                        | 18.32 | 34.25                       | 17.60 | 17.28                                | 0.73  | 16.97 |        |             |        |      |
|          |          | 16                        | 17.49 | 33.32                       | 17.32 | 17.67                                | 0.16  | 15.65 |        |             |        |      |
|          |          | 17                        | 18.67 | 33.28                       | 17.93 | 18.04                                | 0.74  | 15.24 |        |             |        |      |
|          | Average: |                           | 17.81 | 33.75                       | 17.61 | 17.63                                | 0.20  | 16.13 | -15.93 | 0.00        | 62,245 | 1.00 |
|          | Day 50   | 18                        | 16.56 | 34.30                       | 17.18 | 17.49                                | -0.62 | 16.81 |        |             |        |      |
|          |          | 19                        | 16.32 | 32.20                       | 17.41 | 17.15                                | -1.08 | 15.05 |        |             |        |      |
|          |          | 20                        | 16.62 | 28.64                       | 16.94 | 16.56                                | -0.32 | 12.08 |        |             |        |      |
|          |          | 21                        | 17.03 | 33.18                       | 17.27 | 17.55                                | -0.23 | 15.64 |        |             |        |      |
|          |          | 22                        | 16.68 | 31.40                       | 17.22 | 17.55                                | -0.54 | 13.86 |        |             |        |      |
|          | Average: |                           | 16.64 | 31.95                       | 17.20 | 17.26                                | -0.56 | 14.69 | -15.25 | 0.00        | 38,865 | 1.00 |
|          |          |                           |       |                             |       |                                      |       |       |        |             |        |      |
| Vehicle  | Day 3    | 23                        | 33.17 | 34.11                       | 16.83 | 16.99                                | 16.34 | 17.12 |        |             |        |      |
|          |          | 24                        | 34.12 | 33.72                       | 17.17 | 17.09                                | 16.95 | 16.63 |        |             |        |      |
|          |          | Average:                  | 33.64 | 33.92                       | 17.00 | 17.04                                | 16.65 | 16.87 | -0.23  | 0.00        | 1.17   | 1.00 |
|          | Day 8    | 25                        | 33.35 | 34.00                       | 16.42 | 16.82                                | 16.92 | 17.18 |        |             |        |      |
|          |          | 26                        | 32.84 | 32.42                       | 16.88 | 16.10                                | 15.96 | 16.32 |        |             |        |      |
|          |          | Average:                  | 33.09 | 33.21                       | 16.65 | 16.46                                | 16.44 | 16.75 | -0.31  | 0.00        | 1.24   | 1.00 |
|          | Day 22   | 27                        | 34.36 | 32.39                       | 17.84 | 17.69                                | 16.52 | 14.70 |        |             |        |      |
|          |          | 28                        | 33.76 | 34.30                       | 17.84 | 17.85                                | 15.92 | 16.45 |        |             |        |      |
|          |          | Average:                  | 34.06 | 33.34                       | 17.84 | 17.77                                | 16.22 | 15.57 | 0.65   | 0.00        | 0.64   | 1.00 |
|          | Day 50   | 29                        | 33.96 | 33.86                       | 17.81 | 17.71                                | 16.15 | 16.15 |        |             |        |      |
| 30       |          | 32.02                     | 32.90 | 17.53                       | 16.97 | 14.49                                | 15.93 |       |        |             |        |      |
| Average: |          | 32.99                     | 33.38 | 17.67                       | 17.34 | 15.32                                | 16.04 | -0.72 | 0.00   | 1.65        | 1.00   |      |

mean CT = Mean cycle threshold of three repetetive measurements

$\Delta$ CT (delta cycle threshold) = difference in expression between gene of interest, i.e. transgene, and a reference gene (B-actin)

$\Delta\Delta$ CT = difference between  $\Delta$ CT of treated right eye and untreated control left eye. This value is used to calculate fold change

Fold change = Ratio of transgene expression in treated eyes relative to untreated eyes. Calculated as  $2^{-\Delta\Delta CT}$
